# Supplementary material for: Persisting post-infection symptoms 2 years after a large waterborne outbreak of Cryptosporidium hominis in northern Sweden
Source: PubMed Central journal article supplement (PMC6117891; doi:10.1186/s13104-018-3721-y), 2018-08-30

# Enkät uppföljning efter Cryptosporidium-utbrottet vintern 2010/2011. (vuxna)

(Sätt ett kryss i rutorna och använd kulspetspenna)

Födelseår:  (åååå)

Jag är:  man  kvinna

1. Har du de senast tre månaderna haft några av följande symtom

|                                                   | 1-2<br>dagar             | 2-6<br>dagar             | 1 vecka<br>eller mer     | Nej                      |
|---------------------------------------------------|--------------------------|--------------------------|--------------------------|--------------------------|
| - diarré med 3 eller fler lösa avföringar per dag | <input type="checkbox"/> | <input type="checkbox"/> | <input type="checkbox"/> | <input type="checkbox"/> |
| - vattning diarré                                 | <input type="checkbox"/> | <input type="checkbox"/> | <input type="checkbox"/> | <input type="checkbox"/> |
| - blod i diarrén                                  | <input type="checkbox"/> | <input type="checkbox"/> | <input type="checkbox"/> | <input type="checkbox"/> |
| - buksmärtor/magkramper                           | <input type="checkbox"/> | <input type="checkbox"/> | <input type="checkbox"/> | <input type="checkbox"/> |
| - kräkningar                                      | <input type="checkbox"/> | <input type="checkbox"/> | <input type="checkbox"/> | <input type="checkbox"/> |
| - illamående                                      | <input type="checkbox"/> | <input type="checkbox"/> | <input type="checkbox"/> | <input type="checkbox"/> |
| - huvudvärk                                       | <input type="checkbox"/> | <input type="checkbox"/> | <input type="checkbox"/> | <input type="checkbox"/> |
| - ont i ögonen                                    | <input type="checkbox"/> | <input type="checkbox"/> | <input type="checkbox"/> | <input type="checkbox"/> |
| - trötthet/utmattning                             | <input type="checkbox"/> | <input type="checkbox"/> | <input type="checkbox"/> | <input type="checkbox"/> |
| - aptitlöshet                                     | <input type="checkbox"/> | <input type="checkbox"/> | <input type="checkbox"/> | <input type="checkbox"/> |
| - viktnedgång                                     | <input type="checkbox"/> | <input type="checkbox"/> | <input type="checkbox"/> | <input type="checkbox"/> |
| om viktnedgång: <input type="text"/> (antal kilo) |                          |                          |                          |                          |
| - ledbesvär                                       | <input type="checkbox"/> | <input type="checkbox"/> | <input type="checkbox"/> | <input type="checkbox"/> |
| - stela leder                                     | <input type="checkbox"/> | <input type="checkbox"/> | <input type="checkbox"/> | <input type="checkbox"/> |
| - ledvärk                                         | <input type="checkbox"/> | <input type="checkbox"/> | <input type="checkbox"/> | <input type="checkbox"/> |
| - svullna leder                                   | <input type="checkbox"/> | <input type="checkbox"/> | <input type="checkbox"/> | <input type="checkbox"/> |

2. Om du har haft några av symtomen i fråga 1, hur sjuk har du känt dig?

Sätt en kryss i den ruta som stämmer bäst överens för dig. 0 = inte alls sjuk och 10 = mycket sjuk.

| 0                        | 1                        | 2                        | 3                        | 4                        | 5                        | 6                        | 7                        | 8                        | 9                        | 10                       |
|--------------------------|--------------------------|--------------------------|--------------------------|--------------------------|--------------------------|--------------------------|--------------------------|--------------------------|--------------------------|--------------------------|
| <input type="checkbox"/> | <input type="checkbox"/> | <input type="checkbox"/> | <input type="checkbox"/> | <input type="checkbox"/> | <input type="checkbox"/> | <input type="checkbox"/> | <input type="checkbox"/> | <input type="checkbox"/> | <input type="checkbox"/> | <input type="checkbox"/> |

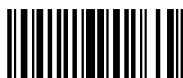

15001

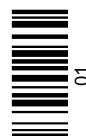

01

3. Har du de senaste 3 månaderna varit hemma från arbete/studier på grund av att du haft symtom enligt fråga 1?

Ja

Nej

Om ja, hur länge?

(antal dagar)

4. Har du besökt sjukvården de senaste 3 månaderna för den symptomen i fråga 1?

Kryssa i ett eller flera alternativ.  
Kommentera gärna vid fråga 10.

nej

ja, hälsocentral

ja, sjukhus

5. Har du något/några av följande besvär eller sjukdomar:

Ja

Nej

- magsårsbesvär

- irriterad tarm (IBS)

- inflammatorisk tarmsjukdom  
(Ulcerös kolit eller Crohns sjukdom)

- glutenintolerans

- laktosintolerans

- andra långvariga tarmbesvär

- diabetes

- KOL/astma

- hjärtsvikt

- reumatisk ledsjukdom

- cancer

6. Behandlas du nu med något/några av följande läkemedel?

Ja

Nej

- medicin mot magsår/sura uppstötningar  
(t ex Omeprazol, Losec, Nexium)

- kortisontabletter

- cellgifter eller andra läkemedel som nedsätter immunförsvaret?

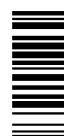



***Tack för att du tog dig tid att besvara frågorna!***

***Vi vill gärna att du skickar ditt svar  
så snart möjligt i bifogat svarskuvert.***

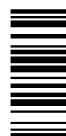

Supplement: 13104_2018_3721_MOESM1_ESM.pdf [file 13104_2018_3721_MOESM1_ESM.pdf]
